# Supplementary material for: Gene discovery using massively parallel pyrosequencing to develop ESTs for the flesh fly Sarcophaga crassipalpis
Source: PubMed Central journal article supplement (PMC2700817; doi:10.1186/1471-2164-10-234), 2009-05-19
Supplement: 1471-2164-10-234-S2.pdf [file 1471-2164-10-234-S2.pdf]

| <b>2a. Repeat type</b> | <b># of hits (repeat length <math>\geq 7</math>)</b> |
|------------------------|------------------------------------------------------|
| dinucleotide           | 295                                                  |
| trinucleotide          | 197                                                  |
| tetranucleotide        | 26                                                   |
| pentanucleotide        | 1                                                    |
| hexanucleotide         | 2                                                    |
| total:                 | 521                                                  |

| <b>2b. Sequence ID</b> | <b>Motif type</b> | <b>Repeat</b>     |
|------------------------|-------------------|-------------------|
| contig01834            | Dinucleotide      | (AT) <sup>8</sup> |
| contig05641            | Dinucleotide      | (AC) <sup>7</sup> |
| contig16973            | Dinucleotide      | (AG) <sup>8</sup> |
| EOHUN8205C5A7Y         | Dinucleotide      | (AC) <sup>8</sup> |
| EOHUN8205CV4AS         | Dinucleotide      | (AG) <sup>7</sup> |
| EOHUN8206DKAGE         | Dinucleotide      | (AT) <sup>7</sup> |
| EOHUN8206DMXVN         | Dinucleotide      | (AT) <sup>7</sup> |
| EOHUN8206DOIGS         | Dinucleotide      | (CT) <sup>7</sup> |
| EOHUN8206DRB8M         | Dinucleotide      | (AG) <sup>7</sup> |
| EUA37Q301A0E6H         | Dinucleotide      | (GT) <sup>8</sup> |
| EUA37Q301A1F2B         | Dinucleotide      | (AC) <sup>7</sup> |
| EUA37Q301A7IH8         | Dinucleotide      | (CT) <sup>8</sup> |
| EUA37Q301A922B         | Dinucleotide      | (AG) <sup>7</sup> |
| EUA37Q301AE7OS         | Dinucleotide      | (AT) <sup>7</sup> |
| EUA37Q301AG9XX         | Dinucleotide      | (AT) <sup>8</sup> |
| EUA37Q301AH1UE         | Dinucleotide      | (AG) <sup>7</sup> |
| EUA37Q301AHPZ4         | Dinucleotide      | (CT) <sup>8</sup> |
| EUA37Q301AITNB         | Dinucleotide      | (CT) <sup>7</sup> |
| EUA37Q301ANFOV         | Dinucleotide      | (GT) <sup>9</sup> |
| EUA37Q301APRZ9         | Dinucleotide      | (GT) <sup>8</sup> |
| EUA37Q301AQ9CB         | Dinucleotide      | (AT) <sup>7</sup> |
| EUA37Q301B0VT3         | Dinucleotide      | (GT) <sup>8</sup> |
| EUA37Q301B328B         | Dinucleotide      | (AG) <sup>9</sup> |
| EUA37Q301B5T21         | Dinucleotide      | (AT) <sup>7</sup> |
| EUA37Q301B74I3         | Dinucleotide      | (AT) <sup>8</sup> |
| EUA37Q301B74WU         | Dinucleotide      | (AG) <sup>8</sup> |
| EUA37Q301B7CAV         | Dinucleotide      | (AT) <sup>8</sup> |
| EUA37Q301B7MQW         | Dinucleotide      | (CT) <sup>9</sup> |
| EUA37Q301B86XG         | Dinucleotide      | (AT) <sup>8</sup> |
| EUA37Q301B9O0K         | Dinucleotide      | (AT) <sup>7</sup> |
| EUA37Q301BAIF3         | Dinucleotide      | (CT) <sup>9</sup> |
| EUA37Q301BB0FP         | Dinucleotide      | (GT) <sup>7</sup> |
| EUA37Q301BC61F         | Dinucleotide      | (CT) <sup>8</sup> |
| EUA37Q301BETVD         | Dinucleotide      | (AT) <sup>7</sup> |
| EUA37Q301BHM22         | Dinucleotide      | (AC) <sup>9</sup> |
| EUA37Q301BHR0D         | Dinucleotide      | (CT) <sup>7</sup> |
| EUA37Q301BJN0I         | Dinucleotide      | (AT) <sup>8</sup> |

|                |              |                    |
|----------------|--------------|--------------------|
| EUA37Q301BJOIW | Dinucleotide | (AG) <sup>7</sup>  |
| EUA37Q301BNJC6 | Dinucleotide | (CT) <sup>7</sup>  |
| EUA37Q301BVGOT | Dinucleotide | (AG) <sup>7</sup>  |
| EUA37Q301BXCMI | Dinucleotide | (AC) <sup>10</sup> |
| EUA37Q301BYST0 | Dinucleotide | (GT) <sup>7</sup>  |
| EUA37Q301BZCMD | Dinucleotide | (CT) <sup>8</sup>  |
| EUA37Q301C0P0F | Dinucleotide | (CT) <sup>7</sup>  |
| EUA37Q301C2VJP | Dinucleotide | (AC) <sup>7</sup>  |
| EUA37Q301C84YS | Dinucleotide | (AG) <sup>9</sup>  |
| EUA37Q301C9I18 | Dinucleotide | (AC) <sup>7</sup>  |
| EUA37Q301CATSU | Dinucleotide | (AG) <sup>8</sup>  |
| EUA37Q301CCHLJ | Dinucleotide | (CT) <sup>8</sup>  |
| EUA37Q301CGOFL | Dinucleotide | (GT) <sup>9</sup>  |
| EUA37Q301CHKEL | Dinucleotide | (CT) <sup>8</sup>  |
| EUA37Q301CISIG | Dinucleotide | (CT) <sup>7</sup>  |
| EUA37Q301CISIG | Dinucleotide | (GT) <sup>8</sup>  |
| EUA37Q301CJNRD | Dinucleotide | (GT) <sup>7</sup>  |
| EUA37Q301COLYD | Dinucleotide | (AT) <sup>7</sup>  |
| EUA37Q301CRH2I | Dinucleotide | (AT) <sup>7</sup>  |
| EUA37Q301CRS68 | Dinucleotide | (CT) <sup>7</sup>  |
| EUA37Q301CU8EH | Dinucleotide | (AC) <sup>12</sup> |
| EUA37Q301CUALA | Dinucleotide | (CT) <sup>9</sup>  |
| EUA37Q301CVZJP | Dinucleotide | (AG) <sup>9</sup>  |
| EUA37Q301D2OEU | Dinucleotide | (AT) <sup>8</sup>  |
| EUA37Q301D3KFI | Dinucleotide | (CT) <sup>7</sup>  |
| EUA37Q301D519O | Dinucleotide | (CT) <sup>12</sup> |
| EUA37Q301D6NNO | Dinucleotide | (AC) <sup>7</sup>  |
| EUA37Q301DA9AI | Dinucleotide | (AG) <sup>7</sup>  |
| EUA37Q301DCNXO | Dinucleotide | (CT) <sup>7</sup>  |
| EUA37Q301DFRSO | Dinucleotide | (GT) <sup>10</sup> |
| EUA37Q301DG0XR | Dinucleotide | (AG) <sup>9</sup>  |
| EUA37Q301DGES7 | Dinucleotide | (AG) <sup>8</sup>  |
| EUA37Q301DH8IZ | Dinucleotide | (GT) <sup>7</sup>  |
| EUA37Q301DJISF | Dinucleotide | (CT) <sup>7</sup>  |
| EUA37Q301DM42W | Dinucleotide | (AT) <sup>7</sup>  |
| EUA37Q301DNCRE | Dinucleotide | (GT) <sup>8</sup>  |
| EUA37Q301DQYLI | Dinucleotide | (GT) <sup>7</sup>  |
| EUA37Q301DS17L | Dinucleotide | (AT) <sup>9</sup>  |
| EUA37Q301DU0DN | Dinucleotide | (GT) <sup>7</sup>  |
| EUA37Q301DUXW4 | Dinucleotide | (AG) <sup>8</sup>  |
| EUA37Q301DVMTL | Dinucleotide | (AC) <sup>11</sup> |
| EUA37Q301DX35X | Dinucleotide | (AC) <sup>7</sup>  |
| EUA37Q301DZUBH | Dinucleotide | (AG) <sup>7</sup>  |
| EUA37Q301E0JDD | Dinucleotide | (AT) <sup>7</sup>  |
| EUA37Q301E2NZI | Dinucleotide | (GT) <sup>9</sup>  |
| EUA37Q301EALU5 | Dinucleotide | (AG) <sup>9</sup>  |

|                |              |                    |
|----------------|--------------|--------------------|
| EUA37Q301EALU5 | Dinucleotide | (AG) <sup>9</sup>  |
| EUA37Q301EF27U | Dinucleotide | (AC) <sup>8</sup>  |
| EUA37Q301EHD57 | Dinucleotide | (AC) <sup>8</sup>  |
| EUA37Q301EIC8Y | Dinucleotide | (AT) <sup>8</sup>  |
| EUA37Q301ENI7R | Dinucleotide | (AT) <sup>7</sup>  |
| EUA37Q301EPLTE | Dinucleotide | (AT) <sup>7</sup>  |
| EUA37Q301ER611 | Dinucleotide | (AG) <sup>8</sup>  |
| EUA37Q301ESDRF | Dinucleotide | (AT) <sup>8</sup>  |
| EUA37Q301EV8JS | Dinucleotide | (AC) <sup>9</sup>  |
| EUA37Q301EXCZ2 | Dinucleotide | (CT) <sup>7</sup>  |
| EUA37Q302F0CHI | Dinucleotide | (AT) <sup>7</sup>  |
| EUA37Q302F1UVM | Dinucleotide | (AC) <sup>7</sup>  |
| EUA37Q302F2MV6 | Dinucleotide | (AG) <sup>15</sup> |
| EUA37Q302FH4UT | Dinucleotide | (CT) <sup>8</sup>  |
| EUA37Q302FM3RP | Dinucleotide | (AT) <sup>7</sup>  |
| EUA37Q302FMY5E | Dinucleotide | (GT) <sup>10</sup> |
| EUA37Q302FOZPB | Dinucleotide | (AT) <sup>8</sup>  |
| EUA37Q302FZJV2 | Dinucleotide | (AC) <sup>7</sup>  |
| EUA37Q302G1RTN | Dinucleotide | (AC) <sup>9</sup>  |
| EUA37Q302G3RN7 | Dinucleotide | (AC) <sup>7</sup>  |
| EUA37Q302G3UX5 | Dinucleotide | (CT) <sup>8</sup>  |
| EUA37Q302G44N6 | Dinucleotide | (AG) <sup>9</sup>  |
| EUA37Q302G7F9B | Dinucleotide | (AC) <sup>7</sup>  |
| EUA37Q302G93N6 | Dinucleotide | (AT) <sup>8</sup>  |
| EUA37Q302GDHWR | Dinucleotide | (CT) <sup>7</sup>  |
| EUA37Q302GFNTM | Dinucleotide | (AC) <sup>7</sup>  |
| EUA37Q302GGRMN | Dinucleotide | (GT) <sup>9</sup>  |
| EUA37Q302GIUP9 | Dinucleotide | (AG) <sup>7</sup>  |
| EUA37Q302GOD8U | Dinucleotide | (AT) <sup>7</sup>  |
| EUA37Q302GPC7A | Dinucleotide | (GT) <sup>12</sup> |
| EUA37Q302GT4WN | Dinucleotide | (AT) <sup>7</sup>  |
| EUA37Q302GTRX6 | Dinucleotide | (CT) <sup>17</sup> |
| EUA37Q302H1C9Q | Dinucleotide | (AC) <sup>7</sup>  |
| EUA37Q302H1NH2 | Dinucleotide | (AT) <sup>7</sup>  |
| EUA37Q302H2M8N | Dinucleotide | (CT) <sup>9</sup>  |
| EUA37Q302H36GZ | Dinucleotide | (AT) <sup>7</sup>  |
| EUA37Q302H4K3I | Dinucleotide | (AG) <sup>7</sup>  |
| EUA37Q302H75JZ | Dinucleotide | (AC) <sup>7</sup>  |
| EUA37Q302H9JCB | Dinucleotide | (CT) <sup>7</sup>  |
| EUA37Q302HCMGG | Dinucleotide | (GT) <sup>7</sup>  |
| EUA37Q302HEY6I | Dinucleotide | (AT) <sup>7</sup>  |
| EUA37Q302HHJGR | Dinucleotide | (CT) <sup>10</sup> |
| EUA37Q302HI1OH | Dinucleotide | (AG) <sup>10</sup> |
| EUA37Q302HOKNH | Dinucleotide | (CT) <sup>8</sup>  |
| EUA37Q302HSAT7 | Dinucleotide | (CT) <sup>8</sup>  |
| EUA37Q302HSP86 | Dinucleotide | (CT) <sup>9</sup>  |

|                   |              |                    |
|-------------------|--------------|--------------------|
| EUA37Q302HTESY    | Dinucleotide | (AC) <sup>10</sup> |
| EUA37Q302HTJTP    | Dinucleotide | (CT) <sup>11</sup> |
| EUA37Q302HU9PF    | Dinucleotide | (AC) <sup>7</sup>  |
| EUA37Q302HUXL4    | Dinucleotide | (AG) <sup>8</sup>  |
| EUA37Q302HWJHC    | Dinucleotide | (AC) <sup>7</sup>  |
| EUA37Q302I05YZ    | Dinucleotide | (CT) <sup>13</sup> |
| EUA37Q302I0JVD    | Dinucleotide | (GT) <sup>7</sup>  |
| EUA37Q302I2Y9Z    | Dinucleotide | (AG) <sup>21</sup> |
| EUA37Q302I5DLQ    | Dinucleotide | (GT) <sup>8</sup>  |
| EUA37Q302I6A2Q    | Dinucleotide | (AG) <sup>8</sup>  |
| EUA37Q302I7UUD    | Dinucleotide | (AG) <sup>10</sup> |
| EUA37Q302I85DB    | Dinucleotide | (GT) <sup>15</sup> |
| EUA37Q302IAMW1    | Dinucleotide | (GT) <sup>10</sup> |
| EUA37Q302IBZEA    | Dinucleotide | (GT) <sup>9</sup>  |
| EUA37Q302IGJ09    | Dinucleotide | (GT) <sup>11</sup> |
| EUA37Q302IGW8Y    | Dinucleotide | (AC) <sup>12</sup> |
| EUA37Q302IJA1I    | Dinucleotide | (AC) <sup>7</sup>  |
| EUA37Q302ILSOZ    | Dinucleotide | (AT) <sup>7</sup>  |
| EUA37Q302ILY0U    | Dinucleotide | (AT) <sup>8</sup>  |
| EUA37Q302IPSMY    | Dinucleotide | (CT) <sup>9</sup>  |
| EUA37Q302IQZQP    | Dinucleotide | (AC) <sup>7</sup>  |
| EUA37Q302IRDRT    | Dinucleotide | (CT) <sup>9</sup>  |
| EUA37Q302IRHWJ    | Dinucleotide | (AT) <sup>9</sup>  |
| EUA37Q302ITNZL    | Dinucleotide | (AC) <sup>7</sup>  |
| EUA37Q302IVJSC    | Dinucleotide | (AG) <sup>7</sup>  |
| EUA37Q302IVTBY    | Dinucleotide | (CT) <sup>11</sup> |
| EUA37Q302IW538    | Dinucleotide | (AT) <sup>9</sup>  |
| EUA37Q302IXFYU    | Dinucleotide | (GT) <sup>10</sup> |
| EUA37Q302IYXTS    | Dinucleotide | (CT) <sup>9</sup>  |
| EUA37Q302IZAL7    | Dinucleotide | (AT) <sup>8</sup>  |
| EUA37Q302J384I    | Dinucleotide | (AC) <sup>7</sup>  |
| EUA37Q302JCKDU    | Dinucleotide | (AC) <sup>9</sup>  |
| EUA37Q302JFU3X    | Dinucleotide | (AT) <sup>7</sup>  |
| EUA37Q302JFWAM    | Dinucleotide | (AC) <sup>8</sup>  |
| EUA37Q302JGIYY    | Dinucleotide | (CT) <sup>10</sup> |
| EUA37Q302JIEVP    | Dinucleotide | (CT) <sup>7</sup>  |
| EUA37Q302JKBA3    | Dinucleotide | (CT) <sup>7</sup>  |
| EUA37Q302JOPQY    | Dinucleotide | (GT) <sup>8</sup>  |
| EUA37Q302JTKEA    | Dinucleotide | (AC) <sup>7</sup>  |
| EUA37Q302JWSTN    | Dinucleotide | (CT) <sup>11</sup> |
| HAHN.FLY.10068.C1 | Dinucleotide | (AC) <sup>8</sup>  |
| HAHN.FLY.10134.C1 | Dinucleotide | (AT) <sup>7</sup>  |
| HAHN.FLY.10138.C2 | Dinucleotide | (AT) <sup>10</sup> |
| HAHN.FLY.10210.C1 | Dinucleotide | (AG) <sup>7</sup>  |
| HAHN.FLY.10210.C5 | Dinucleotide | (AG) <sup>7</sup>  |
| HAHN.FLY.10284.C1 | Dinucleotide | (GT) <sup>7</sup>  |

|                   |              |                    |
|-------------------|--------------|--------------------|
| HAHN.FLY.10304.C1 | Dinucleotide | (AG) <sup>8</sup>  |
| HAHN.FLY.10396.C1 | Dinucleotide | (AG) <sup>7</sup>  |
| HAHN.FLY.1079.C1  | Dinucleotide | (AC) <sup>7</sup>  |
| HAHN.FLY.10850.C1 | Dinucleotide | (AT) <sup>8</sup>  |
| HAHN.FLY.10850.C3 | Dinucleotide | (AT) <sup>7</sup>  |
| HAHN.FLY.10858.C5 | Dinucleotide | (AT) <sup>8</sup>  |
| HAHN.FLY.10945.C1 | Dinucleotide | (AG) <sup>7</sup>  |
| HAHN.FLY.11146.C1 | Dinucleotide | (CT) <sup>7</sup>  |
| HAHN.FLY.11210.C1 | Dinucleotide | (GT) <sup>7</sup>  |
| HAHN.FLY.11361.C1 | Dinucleotide | (CT) <sup>10</sup> |
| HAHN.FLY.11521.C1 | Dinucleotide | (CT) <sup>9</sup>  |
| HAHN.FLY.11568.C1 | Dinucleotide | (GT) <sup>7</sup>  |
| HAHN.FLY.1164.C1  | Dinucleotide | (CT) <sup>10</sup> |
| HAHN.FLY.11901.C1 | Dinucleotide | (GT) <sup>8</sup>  |
| HAHN.FLY.11987.C1 | Dinucleotide | (CT) <sup>7</sup>  |
| HAHN.FLY.12103.C1 | Dinucleotide | (AT) <sup>9</sup>  |
| HAHN.FLY.12260.C1 | Dinucleotide | (AC) <sup>7</sup>  |
| HAHN.FLY.12263.C1 | Dinucleotide | (CT) <sup>7</sup>  |
| HAHN.FLY.12429.C1 | Dinucleotide | (GT) <sup>7</sup>  |
| HAHN.FLY.12511.C1 | Dinucleotide | (AT) <sup>7</sup>  |
| HAHN.FLY.12704.C1 | Dinucleotide | (AC) <sup>7</sup>  |
| HAHN.FLY.12732.C1 | Dinucleotide | (AC) <sup>7</sup>  |
| HAHN.FLY.13171.C1 | Dinucleotide | (AG) <sup>7</sup>  |
| HAHN.FLY.13268.C1 | Dinucleotide | (AC) <sup>8</sup>  |
| HAHN.FLY.13428.C1 | Dinucleotide | (AG) <sup>7</sup>  |
| HAHN.FLY.13490.C1 | Dinucleotide | (GT) <sup>9</sup>  |
| HAHN.FLY.13686.C1 | Dinucleotide | (AT) <sup>7</sup>  |
| HAHN.FLY.1378.C1  | Dinucleotide | (GT) <sup>7</sup>  |
| HAHN.FLY.1378.C2  | Dinucleotide | (AC) <sup>9</sup>  |
| HAHN.FLY.1378.C2  | Dinucleotide | (AC) <sup>9</sup>  |
| HAHN.FLY.14031.C1 | Dinucleotide | (AT) <sup>8</sup>  |
| HAHN.FLY.14220.C1 | Dinucleotide | (AC) <sup>8</sup>  |
| HAHN.FLY.14346.C1 | Dinucleotide | (AT) <sup>7</sup>  |
| HAHN.FLY.14357.C1 | Dinucleotide | (CT) <sup>8</sup>  |
| HAHN.FLY.14722.C1 | Dinucleotide | (CT) <sup>7</sup>  |
| HAHN.FLY.14797.C1 | Dinucleotide | (AT) <sup>7</sup>  |
| HAHN.FLY.14973.C1 | Dinucleotide | (AT) <sup>7</sup>  |
| HAHN.FLY.15.C3    | Dinucleotide | (AT) <sup>7</sup>  |
| HAHN.FLY.15488.C1 | Dinucleotide | (AG) <sup>8</sup>  |
| HAHN.FLY.15837.C1 | Dinucleotide | (AT) <sup>9</sup>  |
| HAHN.FLY.15896.C1 | Dinucleotide | (CT) <sup>7</sup>  |
| HAHN.FLY.16366.C1 | Dinucleotide | (AT) <sup>7</sup>  |
| HAHN.FLY.1654.C1  | Dinucleotide | (AC) <sup>7</sup>  |
| HAHN.FLY.16896.C1 | Dinucleotide | (AG) <sup>8</sup>  |
| HAHN.FLY.1715.C1  | Dinucleotide | (AC) <sup>7</sup>  |
| HAHN.FLY.172.C4   | Dinucleotide | (CT) <sup>8</sup>  |

|                   |              |         |
|-------------------|--------------|---------|
| HAHN.FLY.17282.C1 | Dinucleotide | (AT)^8  |
| HAHN.FLY.17433.C1 | Dinucleotide | (AC)^10 |
| HAHN.FLY.17469.C1 | Dinucleotide | (AG)^7  |
| HAHN.FLY.1939.C4  | Dinucleotide | (CT)^9  |
| HAHN.FLY.2001.C1  | Dinucleotide | (CT)^8  |
| HAHN.FLY.2051.C1  | Dinucleotide | (CT)^12 |
| HAHN.FLY.2084.C1  | Dinucleotide | (AT)^7  |
| HAHN.FLY.2231.C1  | Dinucleotide | (AC)^10 |
| HAHN.FLY.2304.C1  | Dinucleotide | (AG)^8  |
| HAHN.FLY.2479.C1  | Dinucleotide | (AC)^8  |
| HAHN.FLY.2507.C1  | Dinucleotide | (CT)^9  |
| HAHN.FLY.2727.C1  | Dinucleotide | (GT)^7  |
| HAHN.FLY.2896.C1  | Dinucleotide | (AG)^7  |
| HAHN.FLY.3056.C1  | Dinucleotide | (GT)^9  |
| HAHN.FLY.3107.C1  | Dinucleotide | (GT)^7  |
| HAHN.FLY.3109.C1  | Dinucleotide | (AG)^10 |
| HAHN.FLY.3196.C2  | Dinucleotide | (AC)^7  |
| HAHN.FLY.3480.C1  | Dinucleotide | (AG)^7  |
| HAHN.FLY.3815.C1  | Dinucleotide | (CT)^7  |
| HAHN.FLY.3861.C1  | Dinucleotide | (AC)^7  |
| HAHN.FLY.3893.C1  | Dinucleotide | (AC)^7  |
| HAHN.FLY.4313.C1  | Dinucleotide | (AC)^7  |
| HAHN.FLY.461.C1   | Dinucleotide | (AT)^7  |
| HAHN.FLY.4672.C1  | Dinucleotide | (CT)^7  |
| HAHN.FLY.4777.C1  | Dinucleotide | (AG)^7  |
| HAHN.FLY.485.C1   | Dinucleotide | (AC)^7  |
| HAHN.FLY.4863.C1  | Dinucleotide | (GT)^11 |
| HAHN.FLY.492.C1   | Dinucleotide | (CT)^10 |
| HAHN.FLY.4933.C1  | Dinucleotide | (AG)^7  |
| HAHN.FLY.5.C4     | Dinucleotide | (GT)^8  |
| HAHN.FLY.5.C5     | Dinucleotide | (AC)^8  |
| HAHN.FLY.5027.C1  | Dinucleotide | (AC)^8  |
| HAHN.FLY.5400.C1  | Dinucleotide | (AG)^7  |
| HAHN.FLY.5867.C1  | Dinucleotide | (AC)^7  |
| HAHN.FLY.5909.C1  | Dinucleotide | (AC)^10 |
| HAHN.FLY.6025.C1  | Dinucleotide | (AT)^7  |
| HAHN.FLY.6156.C1  | Dinucleotide | (AG)^8  |
| HAHN.FLY.6164.C1  | Dinucleotide | (AC)^7  |
| HAHN.FLY.6176.C1  | Dinucleotide | (AT)^7  |
| HAHN.FLY.6203.C1  | Dinucleotide | (GT)^8  |
| HAHN.FLY.6383.C1  | Dinucleotide | (GT)^7  |
| HAHN.FLY.6411.C1  | Dinucleotide | (AC)^7  |
| HAHN.FLY.6421.C1  | Dinucleotide | (CT)^8  |
| HAHN.FLY.6463.C1  | Dinucleotide | (CT)^7  |
| HAHN.FLY.6475.C1  | Dinucleotide | (AC)^8  |
| HAHN.FLY.6803.C2  | Dinucleotide | (AG)^8  |

|                  |               |                    |
|------------------|---------------|--------------------|
| HAHN.FLY.6813.C1 | Dinucleotide  | (AG) <sup>7</sup>  |
| HAHN.FLY.6873.C1 | Dinucleotide  | (AT) <sup>8</sup>  |
| HAHN.FLY.7197.C1 | Dinucleotide  | (AT) <sup>9</sup>  |
| HAHN.FLY.7578.C1 | Dinucleotide  | (GT) <sup>8</sup>  |
| HAHN.FLY.7614.C1 | Dinucleotide  | (AC) <sup>9</sup>  |
| HAHN.FLY.7722.C1 | Dinucleotide  | (AT) <sup>10</sup> |
| HAHN.FLY.7891.C2 | Dinucleotide  | (AG) <sup>7</sup>  |
| HAHN.FLY.7896.C1 | Dinucleotide  | (AC) <sup>7</sup>  |
| HAHN.FLY.7963.C1 | Dinucleotide  | (GT) <sup>8</sup>  |
| HAHN.FLY.7972.C1 | Dinucleotide  | (CT) <sup>12</sup> |
| HAHN.FLY.8556.C1 | Dinucleotide  | (AT) <sup>8</sup>  |
| HAHN.FLY.8649.C1 | Dinucleotide  | (AG) <sup>8</sup>  |
| HAHN.FLY.8695.C1 | Dinucleotide  | (AC) <sup>7</sup>  |
| HAHN.FLY.8746.C1 | Dinucleotide  | (AG) <sup>9</sup>  |
| HAHN.FLY.877.C1  | Dinucleotide  | (AT) <sup>7</sup>  |
| HAHN.FLY.8927.C4 | Dinucleotide  | (AG) <sup>8</sup>  |
| HAHN.FLY.9108.C1 | Dinucleotide  | (AC) <sup>9</sup>  |
| HAHN.FLY.9203.C2 | Dinucleotide  | (AG) <sup>7</sup>  |
| HAHN.FLY.9300.C1 | Dinucleotide  | (CT) <sup>9</sup>  |
| HAHN.FLY.9358.C1 | Dinucleotide  | (CT) <sup>7</sup>  |
| HAHN.FLY.9460.C1 | Dinucleotide  | (GT) <sup>9</sup>  |
| HAHN.FLY.9496.C1 | Dinucleotide  | (AC) <sup>7</sup>  |
| HAHN.FLY.9530.C6 | Dinucleotide  | (GT) <sup>8</sup>  |
| HAHN.FLY.9539.C2 | Dinucleotide  | (AT) <sup>7</sup>  |
| HAHN.FLY.9585.C1 | Dinucleotide  | (AC) <sup>10</sup> |
| HAHN.FLY.9842.C4 | Dinucleotide  | (GT) <sup>9</sup>  |
| HAHN.FLY.9920.C1 | Dinucleotide  | (AG) <sup>9</sup>  |
| HAHN.FLY.9973.C2 | Dinucleotide  | (AT) <sup>9</sup>  |
| EOHUN8206DIXU6   | Trinucleotide | (GAT) <sup>9</sup> |
| EOHUN8206DKXZL   | Trinucleotide | (CTT) <sup>7</sup> |
| EOHUN8206DRS1P   | Trinucleotide | (AAT) <sup>7</sup> |
| EUA37Q301A60JL   | Trinucleotide | (AAT) <sup>7</sup> |
| EUA37Q301AQOZK   | Trinucleotide | (GAT) <sup>7</sup> |
| EUA37Q301ARDRU   | Trinucleotide | (AGT) <sup>7</sup> |
| EUA37Q301ARDRU   | Trinucleotide | (GGT) <sup>7</sup> |
| EUA37Q301AV5V0   | Trinucleotide | (ATT) <sup>7</sup> |
| EUA37Q301B2MOC   | Trinucleotide | (AGT) <sup>8</sup> |
| EUA37Q301B2ORA   | Trinucleotide | (GTT) <sup>9</sup> |
| EUA37Q301B4B56   | Trinucleotide | (GTT) <sup>7</sup> |
| EUA37Q301B4BFR   | Trinucleotide | (GAT) <sup>7</sup> |
| EUA37Q301BB53N   | Trinucleotide | (AAC) <sup>9</sup> |
| EUA37Q301BBFJU   | Trinucleotide | (GTT) <sup>7</sup> |
| EUA37Q301BGLSF   | Trinucleotide | (AAC) <sup>7</sup> |
| EUA37Q301BJH6U   | Trinucleotide | (ATT) <sup>7</sup> |
| EUA37Q301BKQBP   | Trinucleotide | (ACC) <sup>7</sup> |

|                |               |                     |
|----------------|---------------|---------------------|
| EUA37Q301BLBAO | Trinucleotide | (GTT) <sup>8</sup>  |
| EUA37Q301BN1U6 | Trinucleotide | (CTT) <sup>7</sup>  |
| EUA37Q301BRGPV | Trinucleotide | (AAC) <sup>7</sup>  |
| EUA37Q301BW7ZX | Trinucleotide | (ATT) <sup>8</sup>  |
| EUA37Q301BZPEU | Trinucleotide | (AAC) <sup>8</sup>  |
| EUA37Q301C18JR | Trinucleotide | (AAC) <sup>8</sup>  |
| EUA37Q301C7MZG | Trinucleotide | (GTT) <sup>9</sup>  |
| EUA37Q301C98M4 | Trinucleotide | (AAC) <sup>7</sup>  |
| EUA37Q301C9VPS | Trinucleotide | (AAC) <sup>7</sup>  |
| EUA37Q301CBPRD | Trinucleotide | (ACC) <sup>9</sup>  |
| EUA37Q301CDX2M | Trinucleotide | (AAC) <sup>8</sup>  |
| EUA37Q301CEWOP | Trinucleotide | (AAC) <sup>9</sup>  |
| EUA37Q301COL1L | Trinucleotide | (AAC) <sup>7</sup>  |
| EUA37Q301CRN90 | Trinucleotide | (AAC) <sup>8</sup>  |
| EUA37Q301D34N6 | Trinucleotide | (ACT) <sup>8</sup>  |
| EUA37Q301D3ZIK | Trinucleotide | (GTT) <sup>7</sup>  |
| EUA37Q301DCL88 | Trinucleotide | (AAT) <sup>7</sup>  |
| EUA37Q301DDPLO | Trinucleotide | (AAC) <sup>9</sup>  |
| EUA37Q301DF01X | Trinucleotide | (GTT) <sup>9</sup>  |
| EUA37Q301DG4GQ | Trinucleotide | (GTT) <sup>7</sup>  |
| EUA37Q301DGG6N | Trinucleotide | (GTT) <sup>7</sup>  |
| EUA37Q301DMMW8 | Trinucleotide | (AAC) <sup>7</sup>  |
| EUA37Q301DSIK8 | Trinucleotide | (AAT) <sup>8</sup>  |
| EUA37Q301E52CK | Trinucleotide | (AAT) <sup>7</sup>  |
| EUA37Q301EAFV6 | Trinucleotide | (ATT) <sup>8</sup>  |
| EUA37Q301EEA4R | Trinucleotide | (ACT) <sup>7</sup>  |
| EUA37Q301EHHNO | Trinucleotide | (AAC) <sup>7</sup>  |
| EUA37Q301EJJ0E | Trinucleotide | (AAC) <sup>8</sup>  |
| EUA37Q301EKG8U | Trinucleotide | (AAT) <sup>8</sup>  |
| EUA37Q301ETCO8 | Trinucleotide | (GAT) <sup>8</sup>  |
| EUA37Q302F62XK | Trinucleotide | (ATC) <sup>12</sup> |
| EUA37Q302F6A32 | Trinucleotide | (GTT) <sup>8</sup>  |
| EUA37Q302F8XLC | Trinucleotide | (AAC) <sup>7</sup>  |
| EUA37Q302FN2BU | Trinucleotide | (AAC) <sup>8</sup>  |
| EUA37Q302FQW8X | Trinucleotide | (AGT) <sup>8</sup>  |
| EUA37Q302FVVUF | Trinucleotide | (AGT) <sup>8</sup>  |
| EUA37Q302G52EH | Trinucleotide | (GTT) <sup>7</sup>  |
| EUA37Q302GA197 | Trinucleotide | (AAC) <sup>7</sup>  |
| EUA37Q302GCXR4 | Trinucleotide | (AAT) <sup>7</sup>  |
| EUA37Q302GEBNS | Trinucleotide | (ACG) <sup>7</sup>  |
| EUA37Q302GHUG1 | Trinucleotide | (GTT) <sup>7</sup>  |
| EUA37Q302GKG4S | Trinucleotide | (GTT) <sup>8</sup>  |
| EUA37Q302GMY38 | Trinucleotide | (AAC) <sup>8</sup>  |
| EUA37Q302GTL0P | Trinucleotide | (GTT) <sup>7</sup>  |
| EUA37Q302HD58X | Trinucleotide | (ACT) <sup>7</sup>  |
| EUA37Q302HDXIX | Trinucleotide | (GCT) <sup>8</sup>  |



|                   |               |                     |
|-------------------|---------------|---------------------|
| EUA37Q302HFWLQ    | Trinucleotide | (AAC) <sup>7</sup>  |
| EUA37Q302HGO6Y    | Trinucleotide | (GTT) <sup>8</sup>  |
| EUA37Q302HGWHJ    | Trinucleotide | (GTT) <sup>7</sup>  |
| EUA37Q302HH9WU    | Trinucleotide | (GGT) <sup>10</sup> |
| EUA37Q302HHFIH    | Trinucleotide | (GTT) <sup>7</sup>  |
| EUA37Q302HHTTPV   | Trinucleotide | (AGT) <sup>10</sup> |
| EUA37Q302HLPLU    | Trinucleotide | (AAC) <sup>8</sup>  |
| EUA37Q302HMOFW    | Trinucleotide | (AAG) <sup>9</sup>  |
| EUA37Q302HQIW7    | Trinucleotide | (AAC) <sup>7</sup>  |
| EUA37Q302I0GZD    | Trinucleotide | (AAC) <sup>12</sup> |
| EUA37Q302I0I6S    | Trinucleotide | (GTT) <sup>7</sup>  |
| EUA37Q302I0I6S    | Trinucleotide | (GTT) <sup>7</sup>  |
| EUA37Q302IDZE2    | Trinucleotide | (AAC) <sup>7</sup>  |
| EUA37Q302ILD42    | Trinucleotide | (GTT) <sup>7</sup>  |
| EUA37Q302IQ7PC    | Trinucleotide | (AGT) <sup>9</sup>  |
| EUA37Q302J04OX    | Trinucleotide | (GTT) <sup>9</sup>  |
| EUA37Q302J159U    | Trinucleotide | (AAC) <sup>7</sup>  |
| EUA37Q302J1TBY    | Trinucleotide | (AAC) <sup>8</sup>  |
| EUA37Q302J5WD0    | Trinucleotide | (AAC) <sup>7</sup>  |
| EUA37Q302JASX0    | Trinucleotide | (ATC) <sup>7</sup>  |
| EUA37Q302JFGCQ    | Trinucleotide | (ATT) <sup>7</sup>  |
| EUA37Q302JNUAB    | Trinucleotide | (ACT) <sup>7</sup>  |
| EUA37Q302JOFXW    | Trinucleotide | (GTT) <sup>7</sup>  |
| EUA37Q302JT900    | Trinucleotide | (ATC) <sup>8</sup>  |
| EUA37Q302JXD77    | Trinucleotide | (GAT) <sup>7</sup>  |
| HAHN.FLY.10055.C2 | Trinucleotide | (GAT) <sup>7</sup>  |
| HAHN.FLY.10149.C2 | Trinucleotide | (AAT) <sup>7</sup>  |
| HAHN.FLY.10276.C1 | Trinucleotide | (AAC) <sup>7</sup>  |
| HAHN.FLY.10324.C1 | Trinucleotide | (AAC) <sup>7</sup>  |
| HAHN.FLY.10399.C1 | Trinucleotide | (AAC) <sup>9</sup>  |
| HAHN.FLY.10476.C1 | Trinucleotide | (ATT) <sup>7</sup>  |
| HAHN.FLY.10528.C1 | Trinucleotide | (GTT) <sup>8</sup>  |
| HAHN.FLY.10528.C2 | Trinucleotide | (GTT) <sup>7</sup>  |
| HAHN.FLY.10731.C1 | Trinucleotide | (AAC) <sup>7</sup>  |
| HAHN.FLY.10749.C2 | Trinucleotide | (ATT) <sup>7</sup>  |
| HAHN.FLY.10829.C2 | Trinucleotide | (AAC) <sup>9</sup>  |
| HAHN.FLY.10850.C1 | Trinucleotide | (AAT) <sup>8</sup>  |
| HAHN.FLY.10924.C1 | Trinucleotide | (AAT) <sup>7</sup>  |
| HAHN.FLY.11064.C1 | Trinucleotide | (GTT) <sup>7</sup>  |
| HAHN.FLY.11085.C1 | Trinucleotide | (AAC) <sup>7</sup>  |
| HAHN.FLY.11198.C1 | Trinucleotide | (AAC) <sup>9</sup>  |
| HAHN.FLY.11436.C1 | Trinucleotide | (AAT) <sup>7</sup>  |
| HAHN.FLY.1164.C2  | Trinucleotide | (AAC) <sup>7</sup>  |
| HAHN.FLY.11641.C1 | Trinucleotide | (AAC) <sup>7</sup>  |
| HAHN.FLY.11694.C1 | Trinucleotide | (AAC) <sup>7</sup>  |
| HAHN.FLY.12358.C1 | Trinucleotide | (AAC) <sup>9</sup>  |

|                   |               |          |
|-------------------|---------------|----------|
| HAHN.FLY.12387.C1 | Trinucleotide | (AAC)^7  |
| HAHN.FLY.12415.C1 | Trinucleotide | (GTT)^8  |
| HAHN.FLY.12521.C1 | Trinucleotide | (AAC)^9  |
| HAHN.FLY.12586.C1 | Trinucleotide | (AAC)^7  |
| HAHN.FLY.12912.C1 | Trinucleotide | (AAC)^7  |
| HAHN.FLY.1301.C1  | Trinucleotide | (AAT)^7  |
| HAHN.FLY.13073.C1 | Trinucleotide | (AAC)^8  |
| HAHN.FLY.13191.C1 | Trinucleotide | (AAT)^8  |
| HAHN.FLY.13300.C1 | Trinucleotide | (AAC)^8  |
| HAHN.FLY.13323.C1 | Trinucleotide | (AAC)^7  |
| HAHN.FLY.137.C3   | Trinucleotide | (AAC)^7  |
| HAHN.FLY.14083.C1 | Trinucleotide | (ACT)^12 |
| HAHN.FLY.14227.C1 | Trinucleotide | (ATC)^7  |
| HAHN.FLY.14296.C1 | Trinucleotide | (AAC)^12 |
| HAHN.FLY.14306.C1 | Trinucleotide | (AAC)^8  |
| HAHN.FLY.1431.C2  | Trinucleotide | (AAC)^9  |
| HAHN.FLY.14675.C1 | Trinucleotide | (ACC)^8  |
| HAHN.FLY.14719.C1 | Trinucleotide | (AAC)^8  |
| HAHN.FLY.15381.C1 | Trinucleotide | (AAC)^7  |
| HAHN.FLY.154.C1   | Trinucleotide | (AAC)^7  |
| HAHN.FLY.15650.C1 | Trinucleotide | (ACT)^8  |
| HAHN.FLY.1593.C5  | Trinucleotide | (AAC)^8  |
| HAHN.FLY.16446.C1 | Trinucleotide | (AAC)^12 |
| HAHN.FLY.1654.C1  | Trinucleotide | (GTT)^7  |
| HAHN.FLY.17160.C1 | Trinucleotide | (ACG)^7  |
| HAHN.FLY.1770.C4  | Trinucleotide | (AAT)^7  |
| HAHN.FLY.1936.C3  | Trinucleotide | (ATT)^7  |
| HAHN.FLY.2159.C1  | Trinucleotide | (AAC)^8  |
| HAHN.FLY.2159.C1  | Trinucleotide | (AAC)^9  |
| HAHN.FLY.226.C1   | Trinucleotide | (AAC)^7  |
| HAHN.FLY.245.C1   | Trinucleotide | (ATC)^11 |
| HAHN.FLY.2516.C3  | Trinucleotide | (AAC)^8  |
| HAHN.FLY.2613.C1  | Trinucleotide | (ACT)^7  |
| HAHN.FLY.2902.C1  | Trinucleotide | (AAC)^7  |
| HAHN.FLY.2965.C3  | Trinucleotide | (AAC)^7  |
| HAHN.FLY.3538.C1  | Trinucleotide | (AGC)^7  |
| HAHN.FLY.358.C1   | Trinucleotide | (AAC)^7  |
| HAHN.FLY.37.C17   | Trinucleotide | (ACT)^9  |
| HAHN.FLY.37.C4    | Trinucleotide | (ACC)^9  |
| HAHN.FLY.3705.C1  | Trinucleotide | (GGT)^7  |
| HAHN.FLY.3791.C2  | Trinucleotide | (AAC)^9  |
| HAHN.FLY.381.C1   | Trinucleotide | (AAC)^8  |
| HAHN.FLY.3823.C1  | Trinucleotide | (AAC)^8  |
| HAHN.FLY.3833.C1  | Trinucleotide | (GTT)^11 |
| HAHN.FLY.3981.C1  | Trinucleotide | (AAC)^7  |
| HAHN.FLY.4072.C1  | Trinucleotide | (AAC)^10 |

|                  |                 |                     |
|------------------|-----------------|---------------------|
| HAHN.FLY.4072.C2 | Trinucleotide   | (GTT) <sup>12</sup> |
| HAHN.FLY.4110.C1 | Trinucleotide   | (GCT) <sup>8</sup>  |
| HAHN.FLY.4127.C2 | Trinucleotide   | (GTT) <sup>9</sup>  |
| HAHN.FLY.4208.C1 | Trinucleotide   | (AAC) <sup>7</sup>  |
| HAHN.FLY.4234.C1 | Trinucleotide   | (ACT) <sup>8</sup>  |
| HAHN.FLY.437.C2  | Trinucleotide   | (AAC) <sup>7</sup>  |
| HAHN.FLY.457.C1  | Trinucleotide   | (AAC) <sup>8</sup>  |
| HAHN.FLY.4590.C1 | Trinucleotide   | (AAT) <sup>7</sup>  |
| HAHN.FLY.4700.C1 | Trinucleotide   | (AAC) <sup>9</sup>  |
| HAHN.FLY.5089.C1 | Trinucleotide   | (AAC) <sup>7</sup>  |
| HAHN.FLY.5257.C1 | Trinucleotide   | (GTT) <sup>7</sup>  |
| HAHN.FLY.5423.C1 | Trinucleotide   | (AAC) <sup>9</sup>  |
| HAHN.FLY.547.C1  | Trinucleotide   | (AAC) <sup>9</sup>  |
| HAHN.FLY.5528.C1 | Trinucleotide   | (AAC) <sup>7</sup>  |
| HAHN.FLY.558.C2  | Trinucleotide   | (AAC) <sup>8</sup>  |
| HAHN.FLY.57.C2   | Trinucleotide   | (GTT) <sup>8</sup>  |
| HAHN.FLY.5954.C1 | Trinucleotide   | (AAC) <sup>7</sup>  |
| HAHN.FLY.606.C4  | Trinucleotide   | (AAT) <sup>7</sup>  |
| HAHN.FLY.6086.C1 | Trinucleotide   | (ATT) <sup>9</sup>  |
| HAHN.FLY.6203.C1 | Trinucleotide   | (AAT) <sup>7</sup>  |
| HAHN.FLY.6292.C2 | Trinucleotide   | (GAT) <sup>7</sup>  |
| HAHN.FLY.685.C1  | Trinucleotide   | (AAC) <sup>11</sup> |
| HAHN.FLY.7061.C1 | Trinucleotide   | (AAC) <sup>7</sup>  |
| HAHN.FLY.7167.C1 | Trinucleotide   | (AAT) <sup>7</sup>  |
| HAHN.FLY.7494.C1 | Trinucleotide   | (ACC) <sup>7</sup>  |
| HAHN.FLY.7727.C3 | Trinucleotide   | (GAT) <sup>7</sup>  |
| HAHN.FLY.775.C1  | Trinucleotide   | (AAC) <sup>7</sup>  |
| HAHN.FLY.775.C1  | Trinucleotide   | (AAC) <sup>7</sup>  |
| HAHN.FLY.7969.C1 | Trinucleotide   | (GTT) <sup>7</sup>  |
| HAHN.FLY.8121.C1 | Trinucleotide   | (GTT) <sup>9</sup>  |
| HAHN.FLY.8706.C1 | Trinucleotide   | (AAC) <sup>7</sup>  |
| HAHN.FLY.8721.C1 | Trinucleotide   | (AAC) <sup>8</sup>  |
| HAHN.FLY.8811.C1 | Trinucleotide   | (AAT) <sup>7</sup>  |
| HAHN.FLY.8924.C3 | Trinucleotide   | (AAC) <sup>7</sup>  |
| HAHN.FLY.9005.C1 | Trinucleotide   | (AAC) <sup>7</sup>  |
| HAHN.FLY.9028.C3 | Trinucleotide   | (AAC) <sup>7</sup>  |
| HAHN.FLY.913.C1  | Trinucleotide   | (AAC) <sup>7</sup>  |
| HAHN.FLY.9298.C1 | Trinucleotide   | (AAC) <sup>7</sup>  |
| HAHN.FLY.9298.C2 | Trinucleotide   | (AAC) <sup>7</sup>  |
| HAHN.FLY.9461.C1 | Trinucleotide   | (CGT) <sup>7</sup>  |
| HAHN.FLY.9461.C1 | Trinucleotide   | (ATC) <sup>7</sup>  |
| HAHN.FLY.9865.C2 | Trinucleotide   | (AAT) <sup>8</sup>  |
| EUA37Q301AW8LX   | Tetranucleotide | (ATGT) <sup>7</sup> |
| EUA37Q301BA7UW   | Tetranucleotide | (ACAT) <sup>9</sup> |
| EUA37Q301BDRWD   | Tetranucleotide | (AAAT) <sup>8</sup> |

|                   |                 |                        |
|-------------------|-----------------|------------------------|
| EUA37Q301BK581    | Tetranucleotide | (ACAT) <sup>34</sup>   |
| EUA37Q301BXXA7    | Tetranucleotide | (ATGT) <sup>7</sup>    |
| EUA37Q301C8MLP    | Tetranucleotide | (ATGT) <sup>7</sup>    |
| EUA37Q301CCKD6    | Tetranucleotide | (ATGT) <sup>7</sup>    |
| EUA37Q301DUG7D    | Tetranucleotide | (ATGT) <sup>33</sup>   |
| EUA37Q301E6UTO    | Tetranucleotide | (ATGT) <sup>7</sup>    |
| EUA37Q301EL3SU    | Tetranucleotide | (ATGT) <sup>7</sup>    |
| EUA37Q302F1I65    | Tetranucleotide | (ATGT) <sup>7</sup>    |
| EUA37Q302HAPJO    | Tetranucleotide | (CTTT) <sup>7</sup>    |
| EUA37Q302HTO21    | Tetranucleotide | (ACAT) <sup>8</sup>    |
| EUA37Q302HV3AM    | Tetranucleotide | (CAGT) <sup>7</sup>    |
| EUA37Q302I90KE    | Tetranucleotide | (ATGT) <sup>7</sup>    |
| EUA37Q302ILY06    | Tetranucleotide | (ATGT) <sup>7</sup>    |
| EUA37Q302IQ0LY    | Tetranucleotide | (ATGT) <sup>7</sup>    |
| HAHN.FLY.11854.C1 | Tetranucleotide | (ATGT) <sup>7</sup>    |
| HAHN.FLY.13120.C1 | Tetranucleotide | (ATGT) <sup>7</sup>    |
| HAHN.FLY.13182.C1 | Tetranucleotide | (ATGT) <sup>7</sup>    |
| HAHN.FLY.13401.C1 | Tetranucleotide | (ACAT) <sup>7</sup>    |
| HAHN.FLY.16311.C1 | Tetranucleotide | (ATGT) <sup>10</sup>   |
| HAHN.FLY.432.C1   | Tetranucleotide | (ACAT) <sup>8</sup>    |
| HAHN.FLY.5823.C1  | Tetranucleotide | (ACAT) <sup>8</sup>    |
| HAHN.FLY.7568.C1  | Tetranucleotide | (ACAT) <sup>7</sup>    |
| HAHN.FLY.8348.C1  | Tetranucleotide | (AAAT) <sup>7</sup>    |
| HAHN.FLY.9066.C1  | Pentanucleotide | (AACGT) <sup>9</sup>   |
| HAHN.FLY.162.C2   | Hexanucleotide  | (AATGAC) <sup>8</sup>  |
| HAHN.FLY.714.C1   | Hexanucleotide  | (AAAATG) <sup>11</sup> |

---
